# Supplementary material for: Global priorities for national carnivore conservation under land use change
Source: PubMed Central journal article supplement (PMC4817124; doi:10.1038/srep23814), 2016-04-01
Supplement: srep23814-s1.pdf [file srep23814-s1.pdf]

# Global priorities for national carnivore conservation under land use change

Enrico Di Minin <sup>1,2\*</sup>, Rob Slotow <sup>2,3</sup>, Luke T.B. Hunter <sup>2,4</sup>, Federico Montesino Pouzols <sup>1,5</sup>, Tuuli Toivonen <sup>1,6</sup>, Peter H. Verburg <sup>7</sup>, Nigel Leader-Williams <sup>8</sup>, Lisanne Petracca <sup>4</sup>, Atte Moilanen <sup>1</sup>

1 Department of Biosciences, University of Helsinki, FI-00014, Helsinki, Finland; 2 School of Life Sciences, University of KwaZulu-Natal, Durban 4041, South Africa; 3 Department of Genetics, Evolution and Environment, University College, London, United Kingdom; 4 Panthera, New York, New York, United States of America; 5 Rutherford Appleton Laboratory, Science & Technology Facilities Council, Harwell Oxford Campus, Didcot OX11 0QX, UK; 6 Department of Geography, University of Helsinki, FI-00014, Helsinki, Finland; 7 Faculty Earth and Life Sciences, VU University Amsterdam, De Boelelaan 1087, Amsterdam, 1081 HV, The Netherlands; 8 Department of Geography, University of Cambridge, Downing Place, Cambridge, CB2 3EN, UK.

\*Corresponding author: Email: [enrico.di.minin@helsinki.fi](mailto:enrico.di.minin@helsinki.fi)

## Supplementary Appendix S1

### Results

Table S1 Proportion of range lost due to land-use change from present to future (2040) conditions.

Values are reported for carnivore species grouped by IUCN status, order and body size.

| <b>Group of species</b> | <b>Present</b> | <b>Future</b> |
|-------------------------|----------------|---------------|
| All                     | 0.084          | 0.179         |
| Least Concern           | 0.075          | 0.182         |
| Near Threatened         | 0.085          | 0.159         |
| Vulnerable              | 0.082          | 0.222         |
| Endangered              | 0.066          | 0.113         |
| Critically Endangered   | 0.150          | 0.186         |
| Data Deficient          | 0.074          | 0.180         |
| Carnivora               | 0.090          | 0.195         |
| Dasyuromorphia          | 0.051          | 0.079         |
| Small-bodied            | 0.086          | 0.159         |
| Large-bodied            | 0.077          | 0.178         |

Table S2 Top-ranked predictors of the contribution of each country to carnivore conservation.

| Present                          |        |       |        |                         |                  |          |                     |
|----------------------------------|--------|-------|--------|-------------------------|------------------|----------|---------------------|
| Model                            | AIC    | Delta | Weight | % of deviance explained | Cross-validation | Variable | Relative importance |
| 1 extpres ~ hdi + gini           | 276.80 | 0.00  | 0.33   | 0.38                    | 0.19             | gini     | 1.00                |
| 2 extpres ~ hdi + gini + popdens | 278.03 | 1.23  | 0.18   | 0.38                    |                  | hdi      | 0.82                |
| 3 extpres ~ hdi + gini + prot    | 278.55 | 1.76  | 0.14   | 0.34                    |                  | cpi      | 0.23                |
| 4 extpres ~ gini + cpi           | 278.75 | 1.95  | 0.13   | 0.38                    |                  | popdens  | 0.18                |
| 5 extpres ~ hdi + gini + cpi     | 278.88 | 2.09  | 0.12   | 0.33                    |                  | prot     | 0.12                |
| 6 extpres ~ gini                 | 279.04 | 2.24  | 0.11   | 0.35                    |                  |          |                     |
| Future                           |        |       |        |                         |                  |          |                     |
| Model                            | AIC    | Delta | Weight | % of deviance explained | Cross-validation | Variable | Relative importance |
| 1 extfut ~ hdi + gini            | 300.60 | 0.00  | 0.32   | 0.34                    | 0.23             | gini     | 1.00                |
| 2 extfut ~ gini + cpi            | 301.42 | 0.82  | 0.21   | 0.35                    |                  | hdi      | 0.70                |
| 3 extfut ~ hdi + gini + cpi      | 302.32 | 1.72  | 0.13   | 0.33                    |                  | cpi      | 0.35                |
| 4 Extfut ~ hdi + gini + popdens  | 302.58 | 1.98  | 0.12   | 0.35                    |                  | popdens  | 0.11                |
| 5 extfut ~ hdi + gini + prot     | 302.74 | 2.14  | 0.11   | 0.34                    |                  | prot     | 0.11                |
| 6 extfut ~ gini                  | 302.80 | 2.20  | 0.11   | 0.36                    |                  |          |                     |

Notes: the tildes (~) imply a correlative relationship between the predictors and the response variable (proportion of the country within the top 17% target for carnivore conservation). Abbreviations: AIC, Akaike's information criterion; hdi = human development index; cpi = corruption perception index; popdens = human population density; gini = Gini index; prot = proportion of the country protected.

Figure S1. Box-and-whisker plots showing the representation levels for all carnivore species at the 17% target for the expansion of the protected area network, as listed by the International Union for the Conservation of Nature. LC = least concern; TH = near threatened; VU = vulnerable; EN = endangered; CE = critically endangered; DD = data deficient.

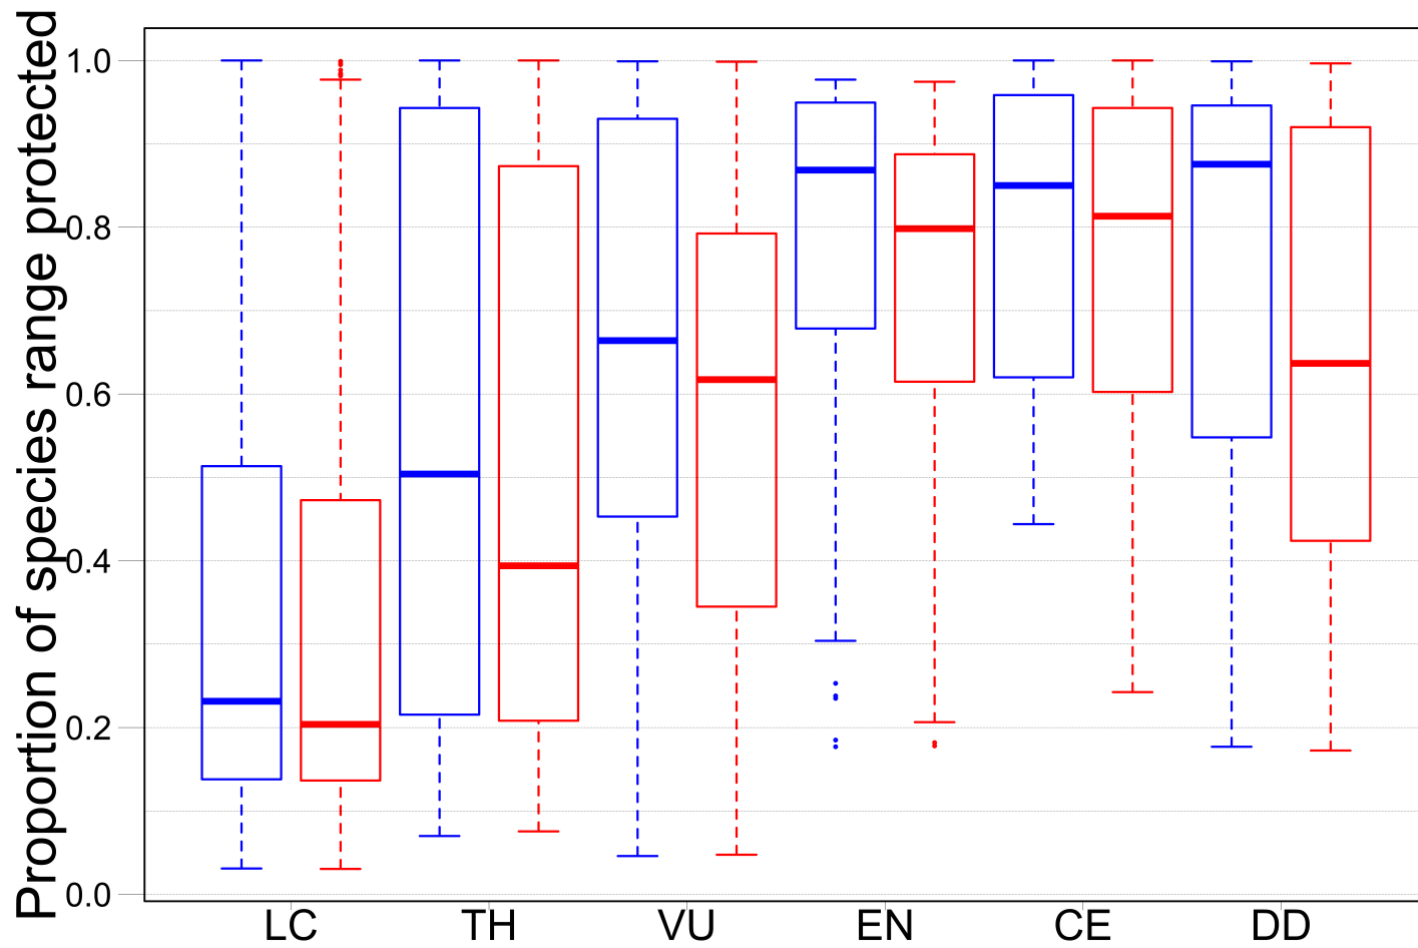

Figure S2. Box-and-whisker plots showing the representation levels for each family belonging to placental and marsupial carnivores at the 17% target for the expansion of the protected area network.

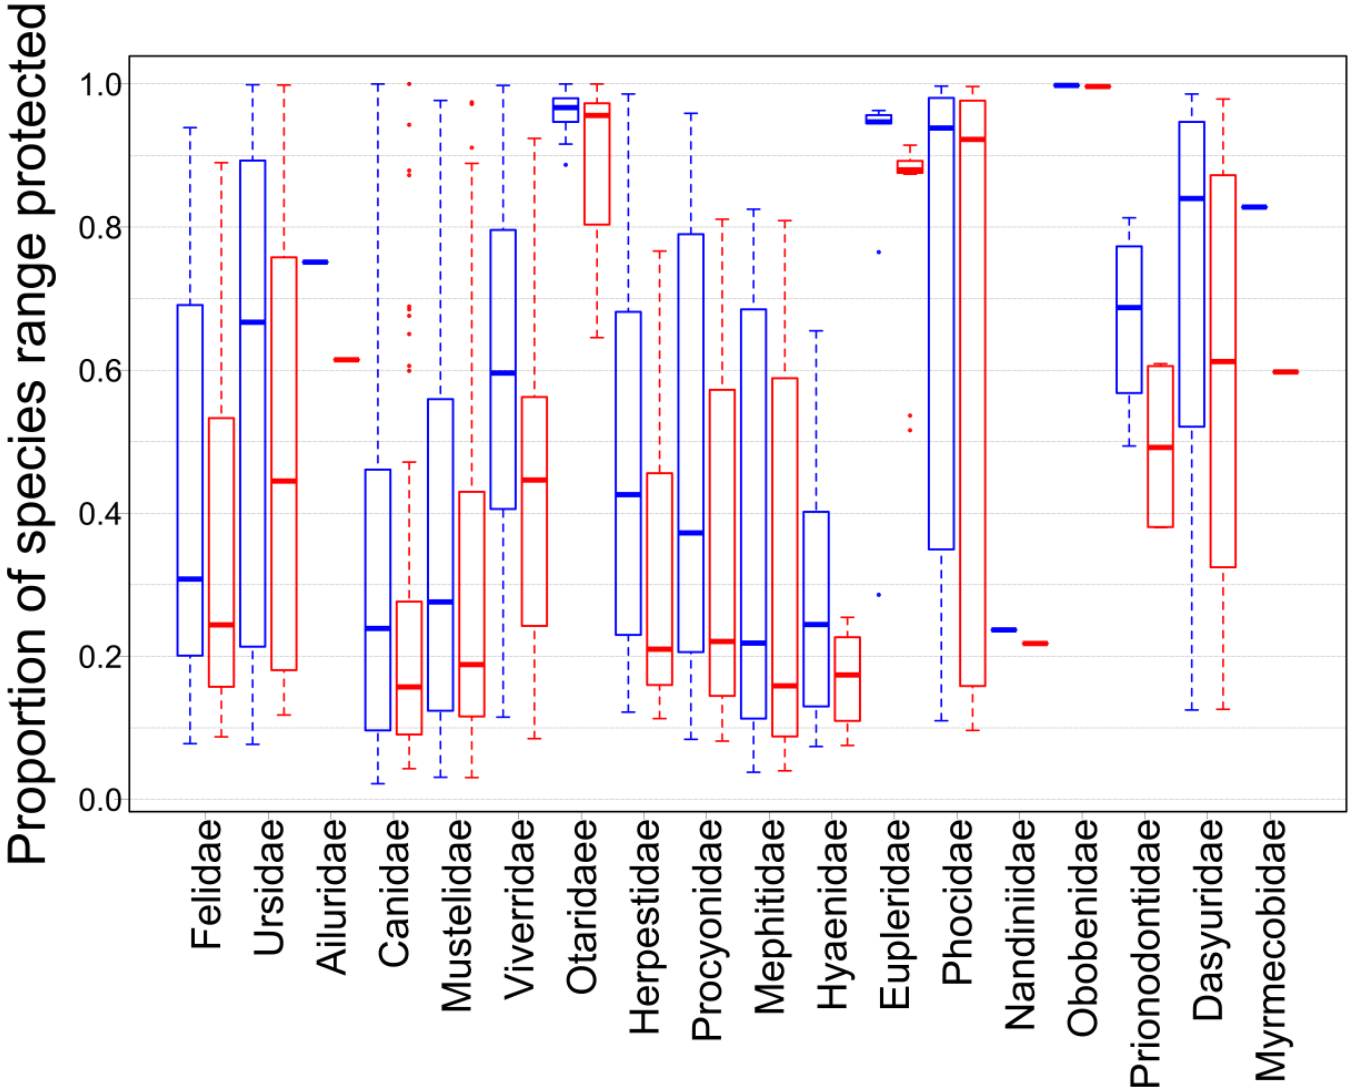

Figure S3. Box-and-whisker plots showing the representation levels for large and small-bodied carnivores at the 17% target for the expansion of the protected area network.

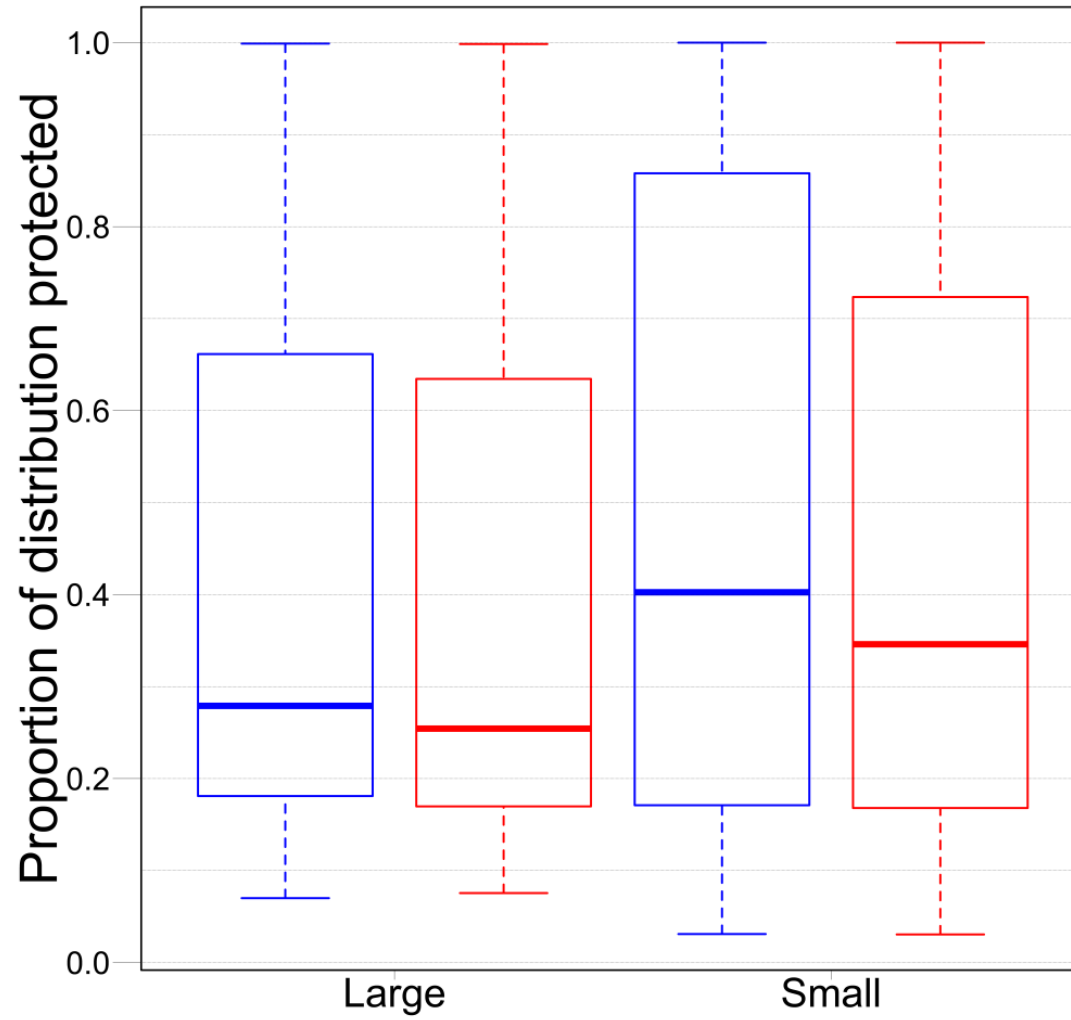

Figure S4. Box-and-whisker plots showing the representation levels for placental (Carnivora) and marsupial (Dasyuromorphia) carnivores at the 17% target for the expansion of the protected area network.

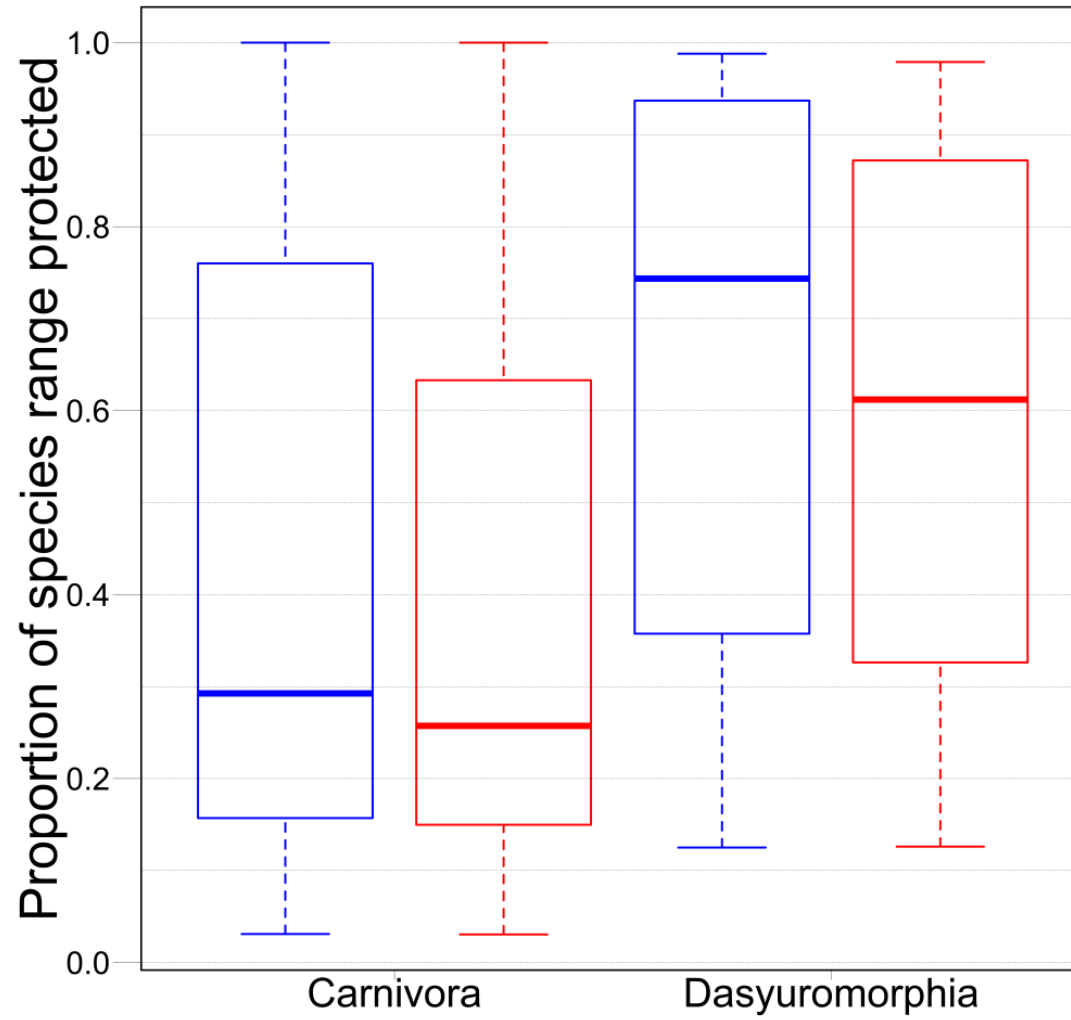

Figure S5. Box-and-whisker plots showing carnivore surrogacy effectiveness at 17% of all terrestrial land protected for (a) amphibians, reptiles, birds, mammals, and ecoregions, and (b) amphibians, reptiles, birds, mammals as listed by the International Union for the Conservation of Nature (LC = least concern; NT = near threatened; VU = vulnerable; EN = endangered; CE = critically endangered), under present (blue), and future (2040, red), land use allocation.

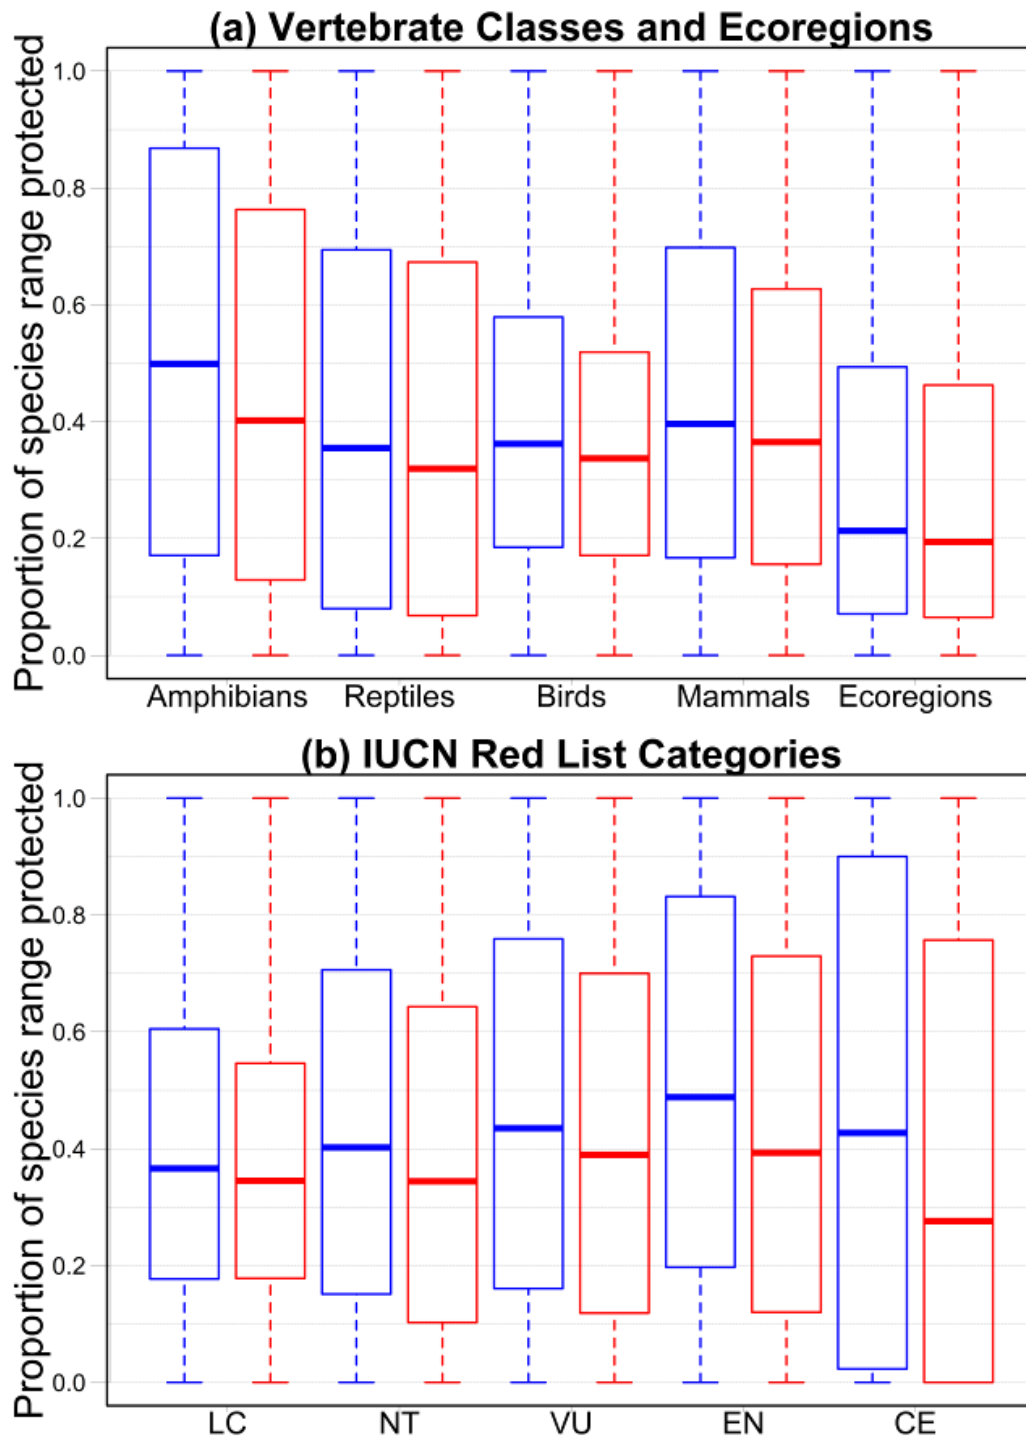



Figure S6. Model-averaged coefficients and standard errors showing the relative effects of five variables on the proportion of a country within the top 17% target for carnivore conservation. Numbers on the bars are the p-values for the significant variables. (a) Present proportion of a country within the top 17% target for carnivore conservation was used as the response variable. (b) Future proportion of a country (based on a consensus scenario) within the top 17% target for carnivore conservation was used as the response variable. Abbreviations: hdi = human development index; cpi = corruption perception index; popdens = human population density; gini = Gini index; prot = proportion of the country protected. For details and interpretation of the variables, see Table S3 below. The dispersion parameter in (a) was 1.861 and in (b) 1.792.

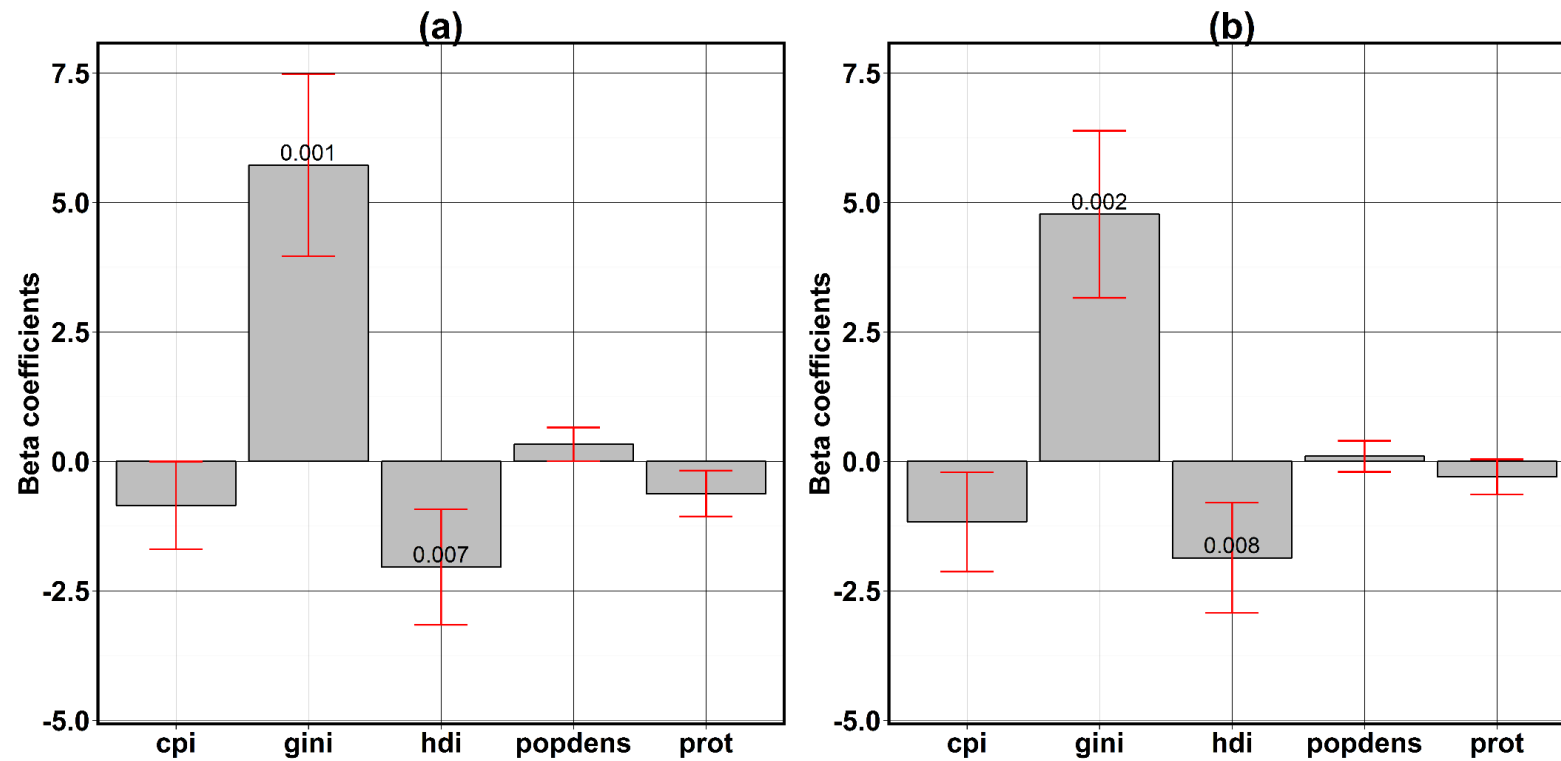

## Methods

Table S3. List of predictor variables used in the generalized linear models, their description, unit, year of the data and source of the data.

| Variable                    | Description                                                                                                                                                        | Unit                                                   | Year | Source                                                                                                                              |
|-----------------------------|--------------------------------------------------------------------------------------------------------------------------------------------------------------------|--------------------------------------------------------|------|-------------------------------------------------------------------------------------------------------------------------------------|
| The Human Development Index | Composite index of human development: a long and healthy life; being knowledgeable; and have a decent standard of living                                           | From 0 = least developed, to 1 = most developed        | 2014 | <a href="http://hdr.undp.org/en/content/human-development-index-hdi">http://hdr.undp.org/en/content/human-development-index-hdi</a> |
| GINI index                  | The extent to which the distribution of income/consumption expenditure among individuals/households within an economy deviates from a perfectly equal distribution | From 0 = perfect equality, to 100 = perfect inequality | 2013 | <a href="http://data.worldbank.org/indicator/SI.POV.GINI?page=1">http://data.worldbank.org/indicator/SI.POV.GINI?page=1</a>         |
| Corruption perception index | An index measuring the perceived level of corruption in the public sector of a country                                                                             | From 0 = highly corrupt, to 100 = least corrupt        | 2014 | <a href="http://www.transparency.org/research/cpi/overview">http://www.transparency.org/research/cpi/overview</a>                   |
| Population density Present  | The density of the population in each country - Present                                                                                                            | No. People per km <sup>2</sup>                         | 2014 | <a href="http://data.worldbank.org/indicator/EN.POP.DNST">http://data.worldbank.org/indicator/EN.POP.DNST</a>                       |
| Population density Future   | The density of the population in each country - Future                                                                                                             | No. People per km <sup>2</sup>                         | 2050 | <a href="http://www.unfpa.org/pds/trends.htm">http://www.unfpa.org/pds/trends.htm</a>                                               |
| Protection                  | Proportion of terrestrial land currently protected                                                                                                                 | % of total land area                                   | 2012 | <a href="http://data.worldbank.org/indicator/ER.LND.PTLD.ZS">http://data.worldbank.org/indicator/ER.LND.PTLD.ZS</a>                 |
